# Supplementary material for: Cholecalciferol supplementation and angiogenic markers in chronic kidney disease
Source: PubMed Central journal article supplement (PMC9165782; doi:10.1371/journal.pone.0268946), 2022-06-03

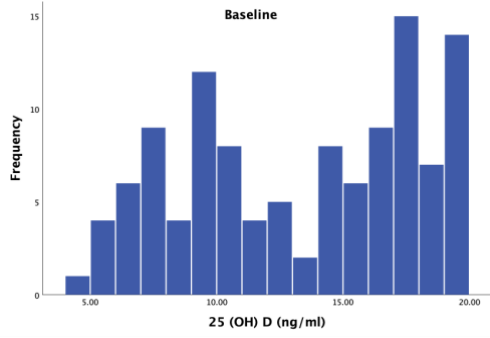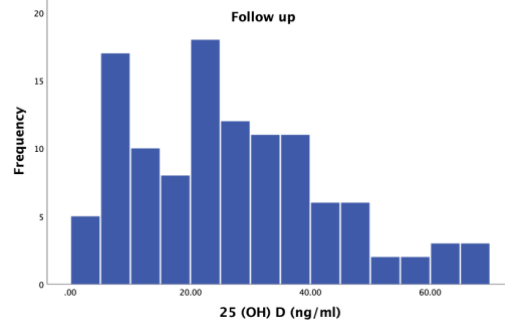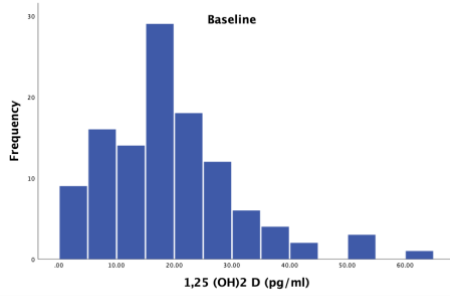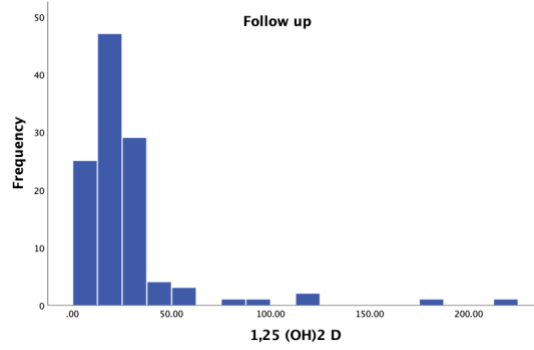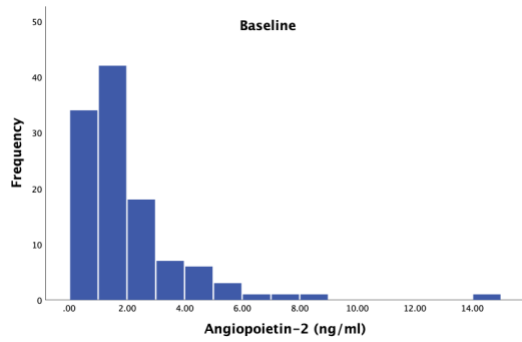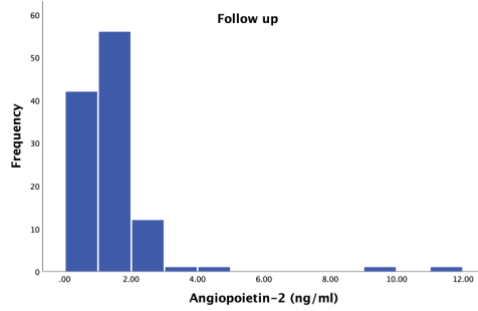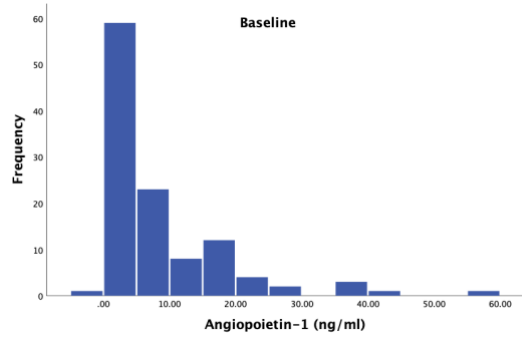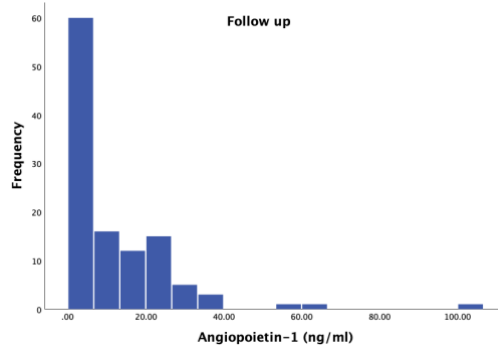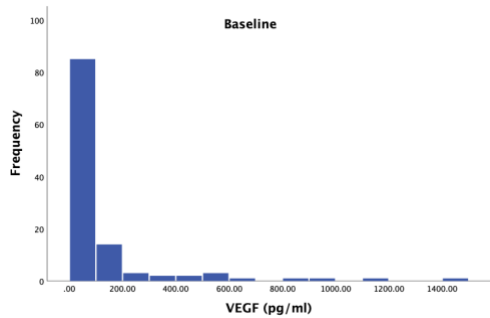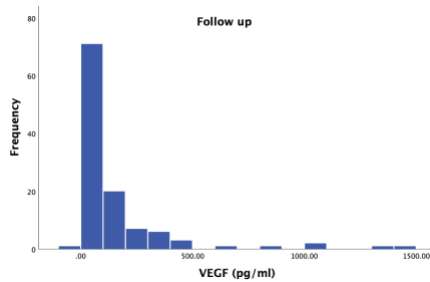

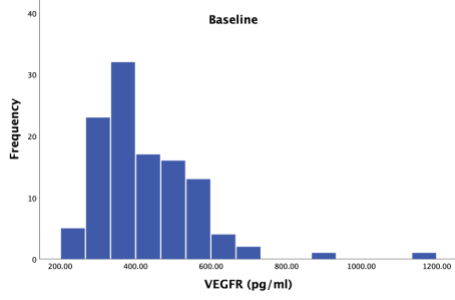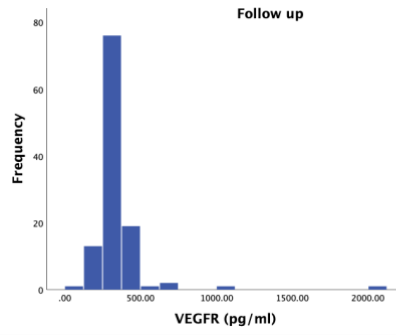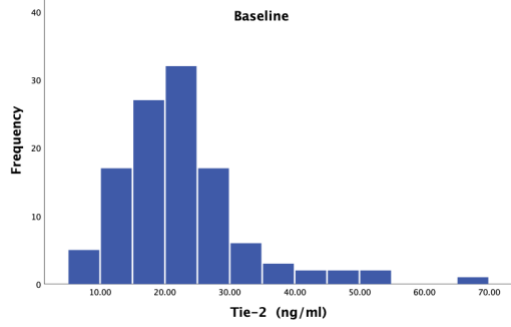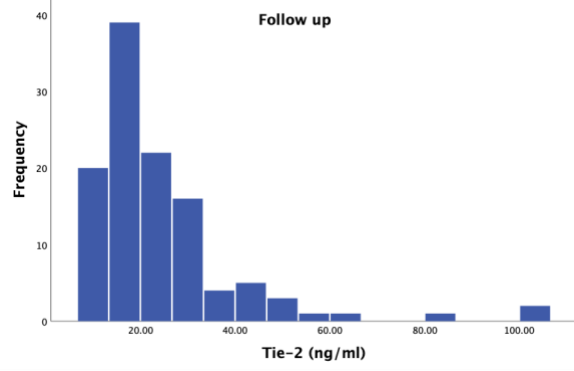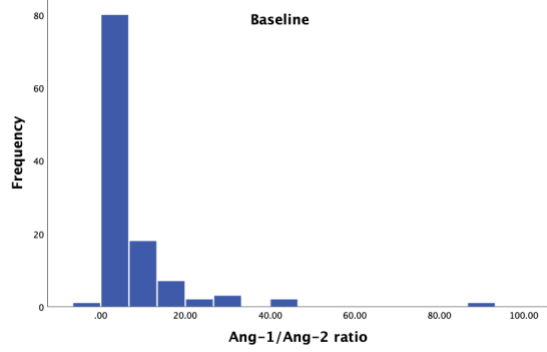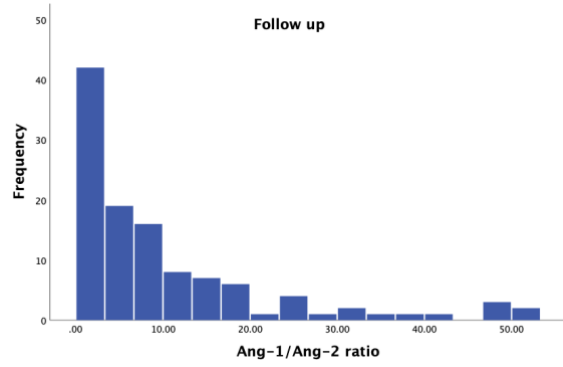

Supplement: pone.0268946.s002.pdf [file pone.0268946.s002.pdf]
